# Supplementary material for: Genome-Wide Identification and Analysis of bHLH Transcription Factors Related to Anthocyanin Biosynthesis in Cymbidium ensifolium
Source: MDPI journal article supplement (doi:10.3390/ijms24043825), 2023-02-14
Supplement: s1 [file s1]

## Supplementary materials

**Table S1. The characteristics of 94 CebHLHs**

| Gene name | Gene ID  | Chromosome | Number of amino acid (aa) | CDS length (bp) | Molecular weight (Da) | Isoelectric point ( <i>pI</i> ) | Aliphatic index | Grand average of hydropathicity (GRAVY) | Subcellular localization |
|-----------|----------|------------|---------------------------|-----------------|-----------------------|---------------------------------|-----------------|-----------------------------------------|--------------------------|
| CebHLH1   | JL008540 | Chr01      | 383                       | 1152            | 41114.77              | 8.87                            | 70.65           | -0.433                                  | Nuclear                  |
| CebHLH2   | JL016410 | Chr01      | 647                       | 1944            | 71192.78              | 6.76                            | 69.97           | -0.554                                  | Nuclear                  |
| CebHLH3   | JL007713 | Chr01      | 390                       | 1173            | 42757.24              | 5.98                            | 85.97           | -0.280                                  | Nuclear                  |
| CebHLH4   | JL014883 | Chr01      | 260                       | 783             | 29687.83              | 9.77                            | 81.42           | -0.683                                  | Nuclear                  |
| CebHLH05  | JL024782 | Chr01      | 252                       | 759             | 28848.80              | 9.56                            | 81.31           | -0.617                                  | Nuclear                  |
| CebHLH06  | JL013196 | Chr01      | 186                       | 561             | 20844.52              | 5.21                            | 80.11           | -0.498                                  | Cytoplasmic              |
| CebHLH07  | JL008801 | Chr01      | 275                       | 828             | 30015.81              | 5.92                            | 88.44           | -0.296                                  | Nuclear                  |
| CebHLH08  | JL001269 | Chr01      | 251                       | 756             | 28157.07              | 5.93                            | 76.57           | -0.490                                  | Nuclear                  |
| CebHLH09  | JL000319 | Chr01      | 253                       | 762             | 27830.68              | 10.13                           | 81.50           | -0.310                                  | Cytoplasmic              |
| CebHLH10  | JL006798 | Chr02      | 249                       | 750             | 27017.66              | 7.69                            | 85.82           | -0.255                                  | Nuclear                  |
| CebHLH11  | JL009723 | Chr02      | 363                       | 1092            | 39664.88              | 6.03                            | 79.92           | -0.400                                  | Nuclear                  |
| CebHLH12  | JL011575 | Chr03      | 764                       | 2295            | 83816.05              | 6.22                            | 68.30           | -0.504                                  | Nuclear                  |
| CebHLH13  | JL010983 | Chr03      | 687                       | 2064            | 78308.27              | 5.73                            | 84.56           | -0.526                                  | Nuclear                  |
| CebHLH14  | JL009396 | Chr03      | 575                       | 1728            | 63845.53              | 5.08                            | 74.85           | -0.510                                  | Chloroplast              |
| CebHLH15  | JL001320 | Chr03      | 346                       | 1041            | 38463.77              | 5.50                            | 73.06           | -0.573                                  | Nuclear                  |
| CebHLH16  | JL010236 | Chr03      | 79                        | 240             | 9101.48               | 9.76                            | 93.80           | -0.294                                  | Chloroplast              |
| CebHLH17  | JL010652 | Chr03      | 85                        | 258             | 9535.81               | 6.58                            | 94.24           | -0.525                                  | Nuclear                  |
| CebHLH18  | JL001467 | Chr03      | 305                       | 918             | 34448.13              | 9.10                            | 84.46           | -0.445                                  | Nuclear                  |
| CebHLH19  | JL020648 | Chr03      | 197                       | 594             | 20885.74              | 9.06                            | 88.17           | -0.184                                  | Nuclear                  |

|          |          |       |     |      |          |       |       |        |                          |
|----------|----------|-------|-----|------|----------|-------|-------|--------|--------------------------|
| CebHLH20 | JL024671 | Chr03 | 174 | 525  | 19095.90 | 9.37  | 92.59 | -0.233 | Nuclear                  |
| CebHLH21 | JL026773 | Chr03 | 122 | 369  | 13395.62 | 10.72 | 99.92 | -0.181 | Cytoplasmic              |
| CebHLH22 | JL007671 | Chr03 | 273 | 822  | 31034.53 | 5.79  | 86.45 | -0.355 | Cytoskeleton             |
| CebHLH23 | JL015016 | Chr03 | 89  | 270  | 10054.29 | 6.58  | 88.88 | -0.655 | Nuclear                  |
| CebHLH24 | JL008345 | Chr04 | 312 | 939  | 34680.19 | 5.43  | 77.82 | -0.464 | Nuclear                  |
| CebHLH25 | JL011143 | Chr04 | 466 | 1401 | 50991.95 | 5.44  | 66.39 | -0.591 | Nuclear                  |
| CebHLH26 | JL002683 | Chr04 | 328 | 987  | 36406.06 | 9.16  | 74.05 | -0.663 | Nuclear                  |
| CebHLH27 | JL007424 | Chr04 | 306 | 921  | 34590.41 | 6.13  | 82.78 | -0.412 | Nuclear                  |
| CebHLH28 | JL000425 | Chr04 | 221 | 666  | 24682.83 | 9.34  | 69.37 | -0.662 | Nuclear                  |
| CebHLH29 | JL019573 | Chr04 | 144 | 435  | 16036.70 | 8.97  | 99.58 | -0.200 | Chloroplast              |
| CebHLH30 | JL022231 | Chr04 | 267 | 804  | 29511.22 | 8.67  | 69.78 | -0.591 | Chloroplast              |
| CebHLH31 | JL012023 | Chr04 | 500 | 1503 | 55218.66 | 5.23  | 89.52 | -0.168 | Nuclear                  |
| CebHLH32 | JL010823 | Chr04 | 213 | 642  | 24160.83 | 9.04  | 94.79 | -0.410 | Cytoplasmic              |
| CebHLH33 | JL017021 | Chr05 | 497 | 1494 | 53492.63 | 5.73  | 75.19 | -0.436 | Nuclear                  |
| CebHLH34 | JL010661 | Chr05 | 205 | 618  | 22577.58 | 7.94  | 66.68 | -0.409 | Nuclear                  |
| CebHLH35 | JL017952 | Chr05 | 226 | 681  | 24761.71 | 7.65  | 78.23 | -0.705 | Chloroplast              |
| CebHLH36 | JL002881 | Chr06 | 418 | 1257 | 45868.72 | 6.32  | 84.67 | -0.363 | Nuclear                  |
| CebHLH37 | JL002882 | Chr06 | 190 | 573  | 21259.48 | 9.67  | 95.89 | -0.465 | Nuclear                  |
| CebHLH38 | JL013595 | Chr06 | 530 | 1593 | 56711.89 | 5.06  | 78.08 | -0.303 | Nuclear                  |
| CebHLH39 | JL016769 | Chr06 | 425 | 1278 | 46848.45 | 6.81  | 69.76 | -0.616 | Nuclear                  |
| CebHLH40 | JL004230 | Chr06 | 294 | 885  | 33390.64 | 6.23  | 79.59 | -0.615 | Nuclear                  |
| CebHLH41 | JL025976 | Chr06 | 243 | 732  | 28019.26 | 9.58  | 73.79 | -0.750 | Chloroplast              |
| CebHLH42 | JL001783 | Chr06 | 401 | 1206 | 44188.63 | 6.74  | 84.06 | -0.346 | Endoplasmic<br>reticulum |
| CebHLH43 | JL025962 | Chr07 | 602 | 1809 | 65863.34 | 8.75  | 72.21 | -0.496 | Nuclear                  |
| CebHLH44 | JL003257 | Chr07 | 320 | 963  | 35395.15 | 6.13  | 83.56 | -0.358 | Chloroplast              |

|          |          |       |     |      |          |      |       |        |               |
|----------|----------|-------|-----|------|----------|------|-------|--------|---------------|
| CebHLH45 | JL003229 | Chr07 | 421 | 1266 | 46044.95 | 5.89 | 85.04 | -0.312 | Nuclear       |
| CebHLH46 | JL015540 | Chr07 | 381 | 1146 | 41652.03 | 6.34 | 81.65 | -0.377 | Nuclear       |
| CebHLH47 | JL005271 | Chr07 | 711 | 2136 | 77851.65 | 6.00 | 71.66 | -0.455 | Nuclear       |
| CebHLH48 | JL022460 | Chr07 | 357 | 1074 | 38886.80 | 6.27 | 58.74 | -0.830 | Nuclear       |
| CebHLH49 | JL014332 | Chr08 | 361 | 1086 | 40096.83 | 8.77 | 58.92 | -0.724 | Nuclear       |
| CebHLH50 | JL009633 | Chr08 | 315 | 948  | 34579.33 | 6.54 | 64.48 | -0.805 | Nuclear       |
| CebHLH51 | JL009635 | Chr08 | 365 | 1098 | 39737.09 | 6.15 | 66.11 | -0.693 | Nuclear       |
| CebHLH52 | JL009179 | Chr08 | 225 | 678  | 25776.82 | 5.26 | 67.69 | -0.704 | Nuclear       |
| CebHLH53 | JL014528 | Chr09 | 255 | 768  | 28714.62 | 7.66 | 83.80 | -0.453 | Nuclear       |
| CebHLH54 | JL005537 | Chr09 | 432 | 1299 | 48551.78 | 9.34 | 93.45 | -0.344 | Nuclear       |
| CebHLH55 | JL006708 | Chr09 | 229 | 690  | 25839.16 | 4.81 | 74.02 | -0.472 | Nuclear       |
| CebHLH56 | JL019946 | Chr09 | 259 | 780  | 29251.35 | 4.83 | 69.03 | -0.754 | Nuclear       |
| CebHLH57 | JL014263 | Chr09 | 314 | 945  | 34357.05 | 6.03 | 93.79 | -0.249 | Nuclear       |
| CebHLH58 | JL016976 | Chr10 | 268 | 807  | 29118.45 | 5.93 | 69.59 | -0.611 | Nuclear       |
| CebHLH59 | JL010513 | Chr10 | 444 | 1335 | 45714.06 | 5.71 | 72.91 | -0.277 | Nuclear       |
| CebHLH60 | JL004493 | Chr10 | 210 | 633  | 23119.94 | 9.90 | 86.86 | -0.253 | Chloroplast   |
| CebHLH61 | JL000658 | Chr10 | 392 | 1179 | 42218.12 | 7.63 | 66.53 | -0.460 | Nuclear       |
| CebHLH62 | JL025659 | Chr10 | 253 | 762  | 27910.15 | 5.48 | 85.30 | -0.101 | Nuclear       |
| CebHLH63 | JL018932 | Chr10 | 330 | 993  | 36311.62 | 5.15 | 62.39 | -0.694 | Cytoplasmic   |
| CebHLH64 | JL005824 | Chr11 | 174 | 525  | 19759.61 | 8.88 | 93.05 | -0.567 | Cytoplasmic   |
| CebHLH65 | JL025300 | Chr11 | 169 | 510  | 18902.99 | 6.16 | 99.17 | -0.176 | Nuclear       |
| CebHLH66 | JL004518 | Chr11 | 298 | 897  | 34035.25 | 6.87 | 69.97 | -0.726 | Nuclear       |
| CebHLH67 | JL009855 | Chr11 | 559 | 1680 | 61612.65 | 6.12 | 76.21 | -0.424 | Nuclear       |
| CebHLH68 | JL005362 | Chr11 | 375 | 1128 | 41054.24 | 4.85 | 82.51 | -0.358 | Nuclear       |
| CebHLH69 | JL004531 | Chr11 | 452 | 1359 | 48769.82 | 6.34 | 69.51 | -0.492 | Nuclear       |
| CebHLH70 | JL007774 | Chr11 | 265 | 798  | 28501.37 | 9.88 | 77.02 | -0.418 | Mitochondrial |

|          |          |       |     |      |          |      |       |        |                              |
|----------|----------|-------|-----|------|----------|------|-------|--------|------------------------------|
| CebHLH71 | JL006752 | Chr11 | 315 | 948  | 35154.04 | 4.95 | 69.68 | -0.673 | Nuclear                      |
| CebHLH72 | JL021099 | Chr12 | 264 | 795  | 29134.49 | 7.94 | 67.58 | -0.734 | Nuclear                      |
| CebHLH73 | JL012150 | Chr12 | 309 | 930  | 34701.55 | 5.70 | 88.38 | -0.361 | Nuclear                      |
| CebHLH74 | JL007736 | Chr12 | 482 | 1449 | 51990.31 | 5.40 | 70.89 | -0.481 | Nuclear                      |
| CebHLH75 | JL019154 | Chr13 | 670 | 2013 | 76096.66 | 5.39 | 78.42 | -0.507 | Nuclear                      |
| CebHLH76 | JL009274 | Chr13 | 352 | 1059 | 37730.85 | 6.71 | 62.90 | -0.575 | Chloroplast                  |
| CebHLH77 | JL024438 | Chr14 | 437 | 1314 | 48689.66 | 5.69 | 68.31 | -0.468 | Nuclear                      |
| CebHLH78 | JL006337 | Chr14 | 292 | 879  | 32929.35 | 5.09 | 77.53 | -0.508 | Nuclear                      |
| CebHLH79 | JL015771 | Chr14 | 244 | 735  | 27400.49 | 7.66 | 70.00 | -0.689 | Nuclear                      |
| CebHLH80 | JL006914 | Chr14 | 279 | 840  | 31910.77 | 7.07 | 89.43 | -0.384 | Nuclear                      |
| CebHLH81 | JL013113 | Chr15 | 85  | 258  | 9724.01  | 6.58 | 90.71 | -0.694 | Chloroplast                  |
| CebHLH82 | JL016513 | Chr15 | 316 | 951  | 35167.00 | 6.03 | 83.39 | -0.284 | Nuclear                      |
| CebHLH83 | JL009988 | Chr15 | 332 | 999  | 35974.45 | 5.25 | 84.16 | -0.389 | Nuclear                      |
| CebHLH84 | JL000223 | Chr15 | 233 | 702  | 26192.80 | 6.06 | 70.39 | -0.715 | Nuclear                      |
| CebHLH85 | JL021345 | Chr16 | 326 | 981  | 35994.65 | 5.85 | 75.67 | -0.478 | Cytoskeleton                 |
| CebHLH86 | JL022359 | Chr16 | 416 | 1251 | 45592.88 | 5.76 | 76.23 | -0.522 | Nuclear                      |
| CebHLH87 | JL003657 | Chr16 | 527 | 1584 | 56829.94 | 5.17 | 78.88 | -0.270 | Nuclear                      |
| CebHLH88 | JL000551 | Chr17 | 291 | 876  | 32244.89 | 4.79 | 77.22 | -0.335 | Nuclear                      |
| CebHLH89 | JL015227 | Chr17 | 314 | 945  | 35051.91 | 8.81 | 82.61 | -0.299 | Nuclear                      |
| CebHLH90 | JL022349 | Chr17 | 143 | 432  | 16043.67 | 8.97 | 91.47 | -0.325 | Chloroplast                  |
| CebHLH91 | JL025286 | Chr17 | 144 | 435  | 16239.96 | 9.26 | 94.17 | -0.336 | Integral membrane<br>protein |
| CebHLH92 | JL003085 | Chr18 | 388 | 1167 | 44542.75 | 9.70 | 85.88 | -0.279 | Mitochondrial                |
| CebHLH93 | JL003086 | Chr18 | 334 | 1005 | 38421.51 | 9.45 | 84.04 | -0.216 | Nuclear                      |
| CebHLH94 | JL003888 | Chr19 | 477 | 1434 | 49851.35 | 8.60 | 79.04 | -0.236 | Chloroplast                  |

**Table S2. *Ka/Ks* analysis of *CebHLHs***

| Seq_1    | Seq_2    | <i>Ka</i>   | <i>Ks</i>   | <i>Ka/Ks</i> | Duplication type | Purify selection |
|----------|----------|-------------|-------------|--------------|------------------|------------------|
| CebHLH11 | CebHLH57 | 0.223524312 | 1.302055357 | 0.17167036   | Segmental        | Yes              |
| CebHLH13 | CebHLH75 | 0.227973347 | 0.781712024 | 0.291633415  | Segmental        | Yes              |
| CebHLH17 | CebHLH81 | 0.059437029 | 1.09576343  | 0.054242574  | Segmental        | Yes              |
| CebHLH18 | CebHLH80 | 0.364059191 | 1.890845935 | 0.192537734  | Segmental        | Yes              |
| CebHLH18 | CebHLH82 | 0.299750451 | 1.236719136 | 0.242375526  | Segmental        | Yes              |
| CebHLH2  | CebHLH47 | 0.181453151 | 0.991036454 | 0.183094325  | Segmental        | Yes              |
| CebHLH25 | CebHLH26 | 0.229468701 | 0.74493883  | 0.308036971  | Segmental        | Yes              |
| CebHLH30 | CebHLH69 | 0.474070668 | 2.041840307 | 0.232178132  | Segmental        | Yes              |
| CebHLH36 | CebHLH45 | 0.186989915 | 1.715684589 | 0.108988515  | Segmental        | Yes              |
| CebHLH45 | CebHLH46 | 0.250912182 | 1.863225855 | 0.134665468  | Segmental        | Yes              |
| CebHLH56 | CebHLH71 | 0.241994403 | 0.844209668 | 0.286652016  | Segmental        | Yes              |
| CebHLH59 | CebHLH94 | 0.190556796 | 0.992500292 | 0.191996715  | Segmental        | Yes              |
| CebHLH80 | CebHLH82 | 0.298098194 | 2.417854303 | 0.123290387  | Segmental        | Yes              |
| CebHLH20 | CebHLH21 | 0.030135881 | 0.021315822 | 1.413779904  | Tandem           | NO               |
| CebHLH36 | CebHLH37 | 0.002355715 | NaN         | NaN          | Tandem           | /                |
| CebHLH4  | CebHLH5  | 0.051343936 | 0.044741124 | 1.14757814   | Tandem           | NO               |
| CebHLH41 | CebHLH42 | 0.118644252 | 0.218042525 | 0.544133545  | Tandem           | Yes              |
| CebHLH50 | CebHLH51 | 0.009902768 | 0.025795127 | 0.383900727  | Tandem           | Yes              |
| CebHLH92 | CebHLH93 | 0.023796766 | 0.054342888 | 0.437900292  | Tandem           | Yes              |

**Table S3. The FPKM values of *CebHLHs* of different color sepals of *C. ensifolium***

| Gene name | Gene ID  | Purple-red  | Red         | Yellow-green | White       |
|-----------|----------|-------------|-------------|--------------|-------------|
| CebHLH1   | JL008540 | 0.985129405 | 1.504891525 | 9.610858258  | 1.872601368 |
| CebHLH2   | JL016410 | 20.50920223 | 6.242717396 | 6.91440287   | 7.350021815 |
| CebHLH4   | JL014883 | 14.61330139 | 26.95219472 | 5.386000471  | 43.99939438 |
| CebHLH5   | JL024782 | 20.91594336 | 10.17476971 | 5.970739059  | 17.17261533 |
| CebHLH6   | JL013196 | 0.034514284 | 0           | 0            | 0           |
| CebHLH7   | JL008801 | 3.071626443 | 10.57155369 | 6.249639627  | 5.922564841 |
| CebHLH8   | JL001269 | 2.919659594 | 5.089479472 | 2.471100741  | 6.058462725 |
| CebHLH9   | JL000319 | 5.887904786 | 3.185729263 | 2.296451975  | 2.672551885 |
| CebHLH10  | JL006798 | 24.62939242 | 16.36834815 | 22.27332069  | 17.88289627 |
| CebHLH11  | JL009723 | 3.594761359 | 2.470469837 | 1.738415613  | 5.214398542 |
| CebHLH12  | JL011575 | 83.59337844 | 35.05169088 | 93.42667369  | 62.96261948 |
| CebHLH13  | JL010983 | 50.68071839 | 17.68106156 | 39.64624922  | 28.90844981 |
| CebHLH14  | JL009396 | 0.13944284  | 0.043332681 | 0            | 0.015986198 |
| CebHLH15  | JL001320 | 0.249850475 | 0.554015045 | 0.07386416   | 0.295269221 |
| CebHLH17  | JL010652 | 6.187773035 | 6.430547752 | 0.202133137  | 20.28468527 |
| CebHLH18  | JL001467 | 0           | 0.027189133 | 0            | 0.030283032 |
| CebHLH19  | JL020648 | 0.419472066 | 0.411736207 | 0.041653604  | 0.0936021   |
| CebHLH22  | JL007671 | 0.681490294 | 0.179206975 | 0.061821673  | 0.286453795 |
| CebHLH23  | JL015016 | 237.8917561 | 553.765711  | 164.3378818  | 742.4865307 |
| CebHLH24  | JL008345 | 8.209123316 | 4.222228446 | 1.947276962  | 7.580347155 |
| CebHLH25  | JL011143 | 97.86315439 | 204.5501466 | 47.89674747  | 133.9858809 |
| CebHLH26  | JL002683 | 164.6637788 | 309.7562618 | 106.9305561  | 236.2534142 |
| CebHLH27  | JL007424 | 0.650339796 | 0.027100569 | 0.081648013  | 0.134924783 |
| CebHLH28  | JL000425 | 0.487379842 | 0.069590817 | 0.300849355  | 0.170389171 |

|          |          |             |             |             |             |
|----------|----------|-------------|-------------|-------------|-------------|
| CebHLH30 | JL022231 | 8.434826867 | 13.04838516 | 7.871792775 | 18.95992902 |
| CebHLH31 | JL012023 | 13.53463496 | 2.921141818 | 3.054374414 | 0.864184836 |
| CebHLH33 | JL017021 | 50.71098062 | 50.05944731 | 63.71386637 | 57.91100442 |
| CebHLH34 | JL010661 | 0.946663359 | 0.767094528 | 0.665872529 | 1.447129374 |
| CebHLH35 | JL017952 | 18.34388956 | 12.5972863  | 25.43571351 | 31.28411233 |
| CebHLH36 | JL002881 | 5.077663618 | 7.620129772 | 22.36818873 | 6.786385116 |
| CebHLH37 | JL002882 | 0.260749887 | 1.723248935 | 0.985704807 | 0.313901173 |
| CebHLH38 | JL013595 | 4.266622988 | 2.343125058 | 1.417423822 | 1.331570547 |
| CebHLH39 | JL016769 | 17.50721471 | 13.1235904  | 20.90380204 | 17.86031869 |
| CebHLH43 | JL025962 | 10.42271529 | 9.788716573 | 21.37864715 | 18.85395548 |
| CebHLH44 | JL003257 | 0.44042191  | 0.263455575 | 2.988380105 | 1.774958671 |
| CebHLH45 | JL003229 | 0.895102588 | 3.189978054 | 0.626721974 | 4.511499414 |
| CebHLH46 | JL015540 | 28.54268726 | 54.64726034 | 100.0350582 | 135.0521964 |
| CebHLH47 | JL005271 | 74.71822752 | 60.49751157 | 48.53281838 | 42.03452085 |
| CebHLH48 | JL022460 | 15.34488263 | 13.36085436 | 11.88609974 | 15.87643824 |
| CebHLH49 | JL014332 | 2.309695125 | 0.872631648 | 1.885270031 | 0.78781208  |
| CebHLH50 | JL009633 | 4.43066071  | 5.143506899 | 4.594098861 | 4.945951494 |
| CebHLH51 | JL009635 | 14.59262118 | 9.330921216 | 9.304078397 | 10.86162699 |
| CebHLH52 | JL009179 | 0.115593988 | 0.036813605 | 0           | 0.08200538  |
| CebHLH54 | JL005537 | 0           | 0.090573204 | 0           | 0.110514939 |
| CebHLH55 | JL006708 | 0.028061613 | 0.037617486 | 0           | 0           |
| CebHLH56 | JL019946 | 0.141903409 | 0.227990263 | 0.223913246 | 0.166847599 |
| CebHLH57 | JL014263 | 0           | 0.185324201 | 0.052364531 | 0           |
| CebHLH58 | JL016976 | 128.0823017 | 288.5363963 | 157.2991048 | 296.1211414 |
| CebHLH59 | JL010513 | 46.62750238 | 15.55777789 | 26.9056451  | 11.67332763 |
| CebHLH60 | JL004493 | 0           | 0.041004843 | 0           | 0.030478958 |

|          |          |             |             |             |             |
|----------|----------|-------------|-------------|-------------|-------------|
| CebHLH61 | JL000658 | 74.01341628 | 32.16559133 | 49.03650128 | 37.26400011 |
| CebHLH62 | JL025659 | 0           | 0.034063078 | 0           | 0           |
| CebHLH63 | JL018932 | 1.167319209 | 0.219026272 | 0.128734862 | 0.161527209 |
| CebHLH64 | JL005824 | 64.79763579 | 55.30840685 | 105.1412564 | 31.0284424  |
| CebHLH65 | JL025300 | 2.475926016 | 6.753782442 | 7.223867795 | 4.901365739 |
| CebHLH66 | JL004518 | 1.962490701 | 0.521325576 | 10.24155697 | 0.477880039 |
| CebHLH67 | JL009855 | 17.2407045  | 7.200106272 | 11.41148848 | 8.624508517 |
| CebHLH68 | JL005362 | 0.01926652  | 0.115053482 | 0.022365062 | 0.049134728 |
| CebHLH69 | JL004531 | 1.027694089 | 0.929672416 | 0.360721336 | 0.760612622 |
| CebHLH70 | JL007774 | 0.497809374 | 5.391999216 | 0.746075664 | 3.682802029 |
| CebHLH72 | JL021099 | 3.36852141  | 8.425013747 | 3.63669741  | 2.226492365 |
| CebHLH73 | JL012150 | 0.020819907 | 0.455760087 | 0.02660456  | 0.020745355 |
| CebHLH74 | JL007736 | 12.74864345 | 9.857597246 | 13.49787599 | 30.90247544 |
| CebHLH75 | JL019154 | 2.444778093 | 7.36556776  | 0.538280093 | 0.569394605 |
| CebHLH76 | JL009274 | 7.518681951 | 16.66844299 | 14.72075198 | 16.17601495 |
| CebHLH77 | JL024438 | 3.598319896 | 4.600355367 | 8.684345553 | 4.405631896 |
| CebHLH78 | JL006337 | 1.053187606 | 0.347690386 | 1.039676218 | 0.909085213 |
| CebHLH79 | JL015771 | 5.939076162 | 3.461516808 | 2.133616687 | 2.333434971 |
| CebHLH80 | JL006914 | 1.856781306 | 1.910873311 | 3.658589422 | 2.614911704 |
| CebHLH81 | JL013113 | 4.058869605 | 1.537901788 | 0.095900158 | 7.474572203 |
| CebHLH82 | JL016513 | 3.59267889  | 2.028292745 | 1.705108868 | 1.621227589 |
| CebHLH83 | JL009988 | 0.323245372 | 0.305925775 | 0.149574117 | 0.537588364 |
| CebHLH84 | JL000223 | 121.9049607 | 272.787499  | 260.2628966 | 226.4729546 |
| CebHLH85 | JL021345 | 0.161612166 | 0.294393675 | 0           | 0.276856079 |
| CebHLH86 | JL022359 | 21.29866653 | 147.8510665 | 53.66366486 | 136.1961303 |
| CebHLH87 | JL003657 | 0.766849273 | 3.559083054 | 0.622575708 | 2.481013618 |



|          |          |             |             |             |             |
|----------|----------|-------------|-------------|-------------|-------------|
| CebHLH88 | JL000551 | 3.73153328  | 2.443921351 | 1.03895436  | 0.804782727 |
| CebHLH89 | JL015227 | 0.275839554 | 1.278377386 | 1.02070804  | 1.08789693  |
| CebHLH91 | JL025286 | 0           | 0.046876824 | 0           | 0.127007586 |
| CebHLH92 | JL003085 | 0.037245304 | 0           | 0           | 0           |
| CebHLH94 | JL003888 | 0.866570768 | 0.879834975 | 0.712641193 | 0.430408706 |

**Table S4. Primers of qRT-PCR**

| Gene name       | Gene ID  | Forward primer (5'-3') | Reverse primer (5'-3')   |
|-----------------|----------|------------------------|--------------------------|
| <i>GAPDH</i>    | JL008987 | GCAATCACCGCCACTCAGAAGA | CACGGAACGCCATAACCAGTCAAT |
| <i>CebHLH13</i> | JL010983 | GTTGGTTCCTTTGGCGTTGA   | CATTCTCTGTGGCGTCTTCG     |
| <i>CebHLH75</i> | JL019154 | ACATCAAGACTCGGAAGACCAC | TCAGGAGATAATGAAGCAGAAGG  |

**Table S5. Primers of subcellular localization**

| Gene name       | Gene ID  | Forward primer (5'-3')                     | Reverse primer (5'-3')                      |
|-----------------|----------|--------------------------------------------|---------------------------------------------|
| <i>CebHLH13</i> | JL010983 | acgggggactcttgaccatggATGGCGGTAGATATGCAGAGC | aagtctctcctttactagtTTTCACTAGTGAATCACGGCACCC |
| <i>CebHLH75</i> | JL019154 | acgggggactcttgaccatggATGGCATCTGAGATGCAGACC | aagtctctcctttactagtAAACAGATTGATCTGTCCTTTG   |
